# Supplementary material for: Integrative approach using liver and duodenum RNA-Seq data identifies candidate genes and pathways associated with feed efficiency in pigs
Source: PubMed Central journal article supplement (PMC5764994; doi:10.1038/s41598-017-19072-5), 2018-01-11

## **Integrative approach using liver and duodenum RNASeq data identifies candidate genes and pathways associated with feed efficiency in pigs**

Yuliaxis Ramayo-Caldas<sup>1\*</sup>, Maria Ballester<sup>1</sup>, Juan Pablo Sánchez<sup>1</sup>, Olga González-Rodríguez<sup>1</sup>, Manuel Revilla<sup>2,3</sup>, Henry Reyer<sup>4</sup>, Klaus Wimmers<sup>4,5</sup>, David Torrallardona<sup>6</sup>, Raquel Quintanilla<sup>1\*</sup>

<sup>1</sup>Animal Breeding and Genetics Program, Institute for Research and Technology in Food and Agriculture (IRTA), Torre Marimon, Caldes de Montbui, 08140, Spain; <sup>2</sup>Animal Genomics Department, Centre for Research in Agricultural Genomics (CRAG), Campus UAB, Bellaterra, 08193, Spain; <sup>3</sup>Departament de Ciència Animal i dels Aliments, Universitat Autònoma de Barcelona (UAB), 08193, Bellaterra, Spain; <sup>4</sup>Institute of Genome Biology, Leibniz Institute for Farm Animal Biology (FBN), Wilhelm-Stahl-Allee 2, Dummerstorf, 18196, Germany; <sup>5</sup>Faculty of Agricultural and Environmental Sciences, University Rostock, Rostock, 18059, Germany <sup>6</sup>Animal Nutrition Program, IRTA, Mas de Bover, Constantí, 43120, Spain.

\*Corresponding author: [yuliaxis.ramayo@irta.cat](mailto:yuliaxis.ramayo@irta.cat) and [raquel.quintanilla@irta.cat](mailto:raquel.quintanilla@irta.cat)

### **Supplementary Information**

**Supplementary Table S1.** Description of the differentially expressed genes detected in liver and duodenum between L<sub>FE</sub> and H<sub>FE</sub> groups of pigs

**Supplementary Table S2.** Genes reported as differentially expressed in pig lines divergent selected for RFI.

**Supplementary Table S3.** Pathways differentially-modulated between low efficient (L<sub>FE</sub>) and high efficient (H<sub>FE</sub>) groups of pigs in liver and duodenum.

**Supplementary Table S4.** List of gene module membership in liver and duodenum tissue

**Supplementary Table S5.** Over-represented pathways in genes gathered by FE associated co-expression modules identified in liver and duodenum.

**Supplementary Table S6.** Genes grouped in FE associated co-expression modules in liver and duodenum that had been reported as associated with feed efficiency in pigs and/or other species.

**Supplementary Table S7.** Putative transcription factors (TF) that may be regulating candidate genes (identified by *in silico* detection of enriched TF binding motifs).

**Supplementary Table S8.** Putative transcription factors (TF) that may be regulating the 12 common candidate genes (identified by *in silico* detection of enriched TF binding motifs).

**Supplementary Table S9.** Canonical pathways commonly identified by the DE and WGNCA analysis.

**Supplementary Table S10.** Description and read counts data of the genes employed in the analysis.

**Supplementary Table S11.** Primers used for gene expression quantification by qPCR.

**Supplementary Table S11.** Primers used for gene expression quantification by qPCR.

| <b>Primer Name</b> | <b>Sequence<sup>a</sup></b>             |
|--------------------|-----------------------------------------|
| ATF3-RT-Fw         | 5'- TCA GTC ACG AAA GCC GAG GTA -3'     |
| ATF3-RT-Rv         | 5'- GGC GGC GGC AAT CTT ATT -3'         |
| CRYAB-RT-Fw        | 5'- AGG AAC TCA AGG TCA AGG TGT TG -3'  |
| CRYAB-RT-Rv        | 5'- ATG TTC ATC CTG GCG CTC TT -3'      |
| HSPB8-RT-Fw        | 5'- GGC AAA CAC GAG GAG AAG CA -3'      |
| HSPB8-RT-Rv        | 5'- CAC CTC TGC AGG AAG CTG AAT T -3'   |
| HSPH1-RT-Fw        | 5'- TGG TGG AGT TGG AAT AAA GGT CAT -3' |
| HSPH1-RT-Rv        | 5'- TGG CTG TTA TCT GCT CCA CAC T -3'   |
| HPRT1-RT-Fw        | 5'- TCA TTA TGC CGA GGA TTT GGA -3'     |
| HPRT1-RT-Rv        | 5'- CTC TTT CAT CAC ATC TCG AGC AA -3'  |
| ACTB-RT-Fw         | 5'- CAA GGA CCT CTA CGC CAA CAC -3'     |
| ACTB-RT-Rv         | 5'- TGG AGG CGC GAT GAT CTT -3'         |

**Supplementary Figure S1.** Co-expression patterns among *STIP1*, *HSPA2*, *HSPA4L*, *HSPH1*, *DNAJA1* and *DNAJB1* within and across liver and duodenum tissues.

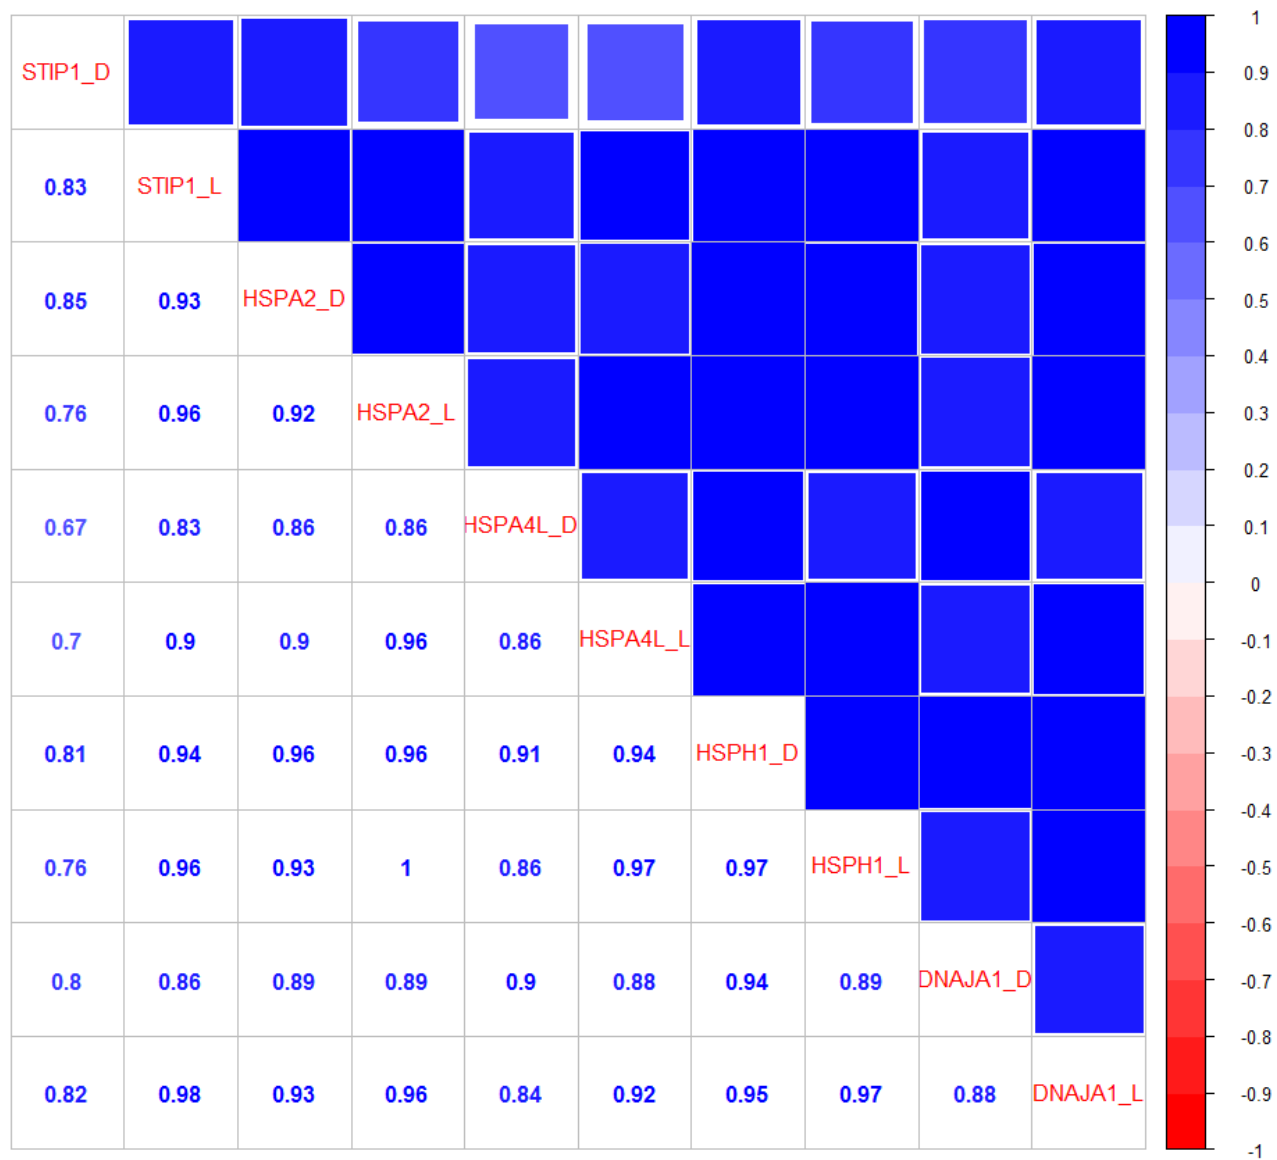

Supplement: 41598_2017_19072_MOESM1_ESM.pdf [file 41598_2017_19072_MOESM1_ESM.pdf]
